# Supplementary material for: Towards Reference Values for Malondialdehyde on Exhaled Breath Condensate: A Systematic Literature Review and Meta-Analysis
Source: MDPI journal article supplement (doi:10.3390/toxics10050258), 2022-05-18
Supplement: s1 [file s1]

| Author, year, country            | Study objectives                                                                                                          | Population studied and number of participants                                  | Control population                                | Method of EBC collection and analysis                                                                                                   | Main findings                                                                                                                                                                                                                                                                             | Quality score |
|----------------------------------|---------------------------------------------------------------------------------------------------------------------------|--------------------------------------------------------------------------------|---------------------------------------------------|-----------------------------------------------------------------------------------------------------------------------------------------|-------------------------------------------------------------------------------------------------------------------------------------------------------------------------------------------------------------------------------------------------------------------------------------------|---------------|
| <b>Aksu, 2012, Turkey [1]</b>    | to investigate lower airway inflammation using malondialdehyde and total protein measurement in exhaled breath condensate | 12 mild asthma, 53 persistent rhinitis, and 16 concomitant asthma and rhinitis | 13 controls, 5 males and 8 women                  | EBC was collected with a homemade apparatus for max 15 mins at 10.00 am, no nose clip, immediately stored at -80°C                      | MDA and total protein levels in EBC did not differ between the groups                                                                                                                                                                                                                     | 14 moderate   |
| <b>Andreoli, 2003, Italy [2]</b> | method developement                                                                                                       | none                                                                           | 2 nonsmoking controls and 13 asymptomatic smokers | EBC collected on EcoScreen, 15 mins with nose clip and then quickly stored at -80°C                                                     | MDA concentrations were consistent with those determined in EBC using an independent HPLC FLD method, mass spectrometry to EBC analysis could play a fundamental role in the validation of EBC as a new accessible biological matrix and in the definition of standardized EBC collection | 12 moderate   |
| <b>Antus, 2015, Hungary [3]</b>  | to investigate oxidative stress in cystic fibrosis (CF) patients                                                          | 40 patients with CF                                                            | 25 controls, 13 males and 12 females              | EBC collection with an EcoScreen condenser using MDA reagent kit, MDA concentrations in EBC were measured with an isocratic HPLC system | MDA concentration in EBC, sputum and plasma did not correlate; there also no correlation between MDA levels in these matrices and FENO and lung function                                                                                                                                  | 19 high       |

|                                  |                                                                                           |                       |                                                        |                                                                                                                                                                                                                                                                                                                  |                                                                                                                                        |             |
|----------------------------------|-------------------------------------------------------------------------------------------|-----------------------|--------------------------------------------------------|------------------------------------------------------------------------------------------------------------------------------------------------------------------------------------------------------------------------------------------------------------------------------------------------------------------|----------------------------------------------------------------------------------------------------------------------------------------|-------------|
| <b>Antus, 2013, Hungary [4]</b>  | to investigate MDA levels in patients with acute COPD exacerbation                        | 55 patients with COPD | 20 healthy controls, ex-smokers, 10 women and 10 males | EBC collected for 10 min EcoScreen condenser ,samples were stored frozen at -80°C before analysis, isocratic HPLC system using MDA reagent kit                                                                                                                                                                   | No correlations between EBC, sputum and plasma MDA and FENO, lung functions and blood gas parameters either in stable or acute disease | 12 moderate |
| <b>Antczak, 1997, Poland [5]</b> | to determine wether asthmatic patients exhale more H2O2 and TBARS than healthy subjects   | 21 asthmatic patients | 10 healthy subjects, 6 males and 4 females             | EBC collected in a tube installed, in a polystyrene foam container filled with ice and salt, for 20 mins and aliquots were transferred in Eppendorf tubes stored at -80°C for not longer than 7 days until measurement. TBAR species in expired breath condensate was determined according to the method of YAGI | H2O2 was 26 times higher in asthmatic EBC, as it was for the TBARS, these findings were statistically significant                      | 15 moderate |
| <b>Araneda, 2005, Chile [6]</b>  | to investigate lung oxidative stress in subjects exercising in moderate and high altitude | none                  | 6 healthy males                                        | EBC collected with self-constructed device for 20 mins, condensated ad - 5°C, and stored in liquid nitrogen. MDA was determined with HPLC according to Larstad                                                                                                                                                   | Lung OS may constitute a pathogenic factor in acute mountain sickness                                                                  | 11 moderate |

|                                    |                                                                                                                                          |                                                                                                                                   |                                                                                                 |                                                                                                                                                                                     |                                                                                                                                                                                                                   |             |
|------------------------------------|------------------------------------------------------------------------------------------------------------------------------------------|-----------------------------------------------------------------------------------------------------------------------------------|-------------------------------------------------------------------------------------------------|-------------------------------------------------------------------------------------------------------------------------------------------------------------------------------------|-------------------------------------------------------------------------------------------------------------------------------------------------------------------------------------------------------------------|-------------|
| <b>Araneda, 2012, Chile [7]</b>    | to investigate the impact of an endurance race on pulmonary pro-oxidative formation and lipoperoxidation                                 | 41 healthy recreational runners divided in 3 groups according to the races they decided to run (10, 21.1 and 41.2 km) non smokers | two groups (10 and 42.2 km) with MDA in EBC pre-race Data was available just for these subjects | EBC collected with self-constructed device for 10 to 20 mins, with nose clip, condensated ad -5°C, and stored in liquid nitrogen. MDA was determined with HPLC according to Larstad | Intense prolonged exercise favors the increase in pulmonary pro-oxidative levels, with no modifications on lipoperoxidation. Running time relates to the magnitude of acute post exercise pro-oxidative formation | 12 moderate |
| <b>Araneda, 2013, Chile [8]</b>    | to investigate pro-oxidative, lipid peroxidation and inflammation in EBC,in subjects running 10 km                                       | none                                                                                                                              | 10 physically active healthy subjects, 9 males and 1 female; 20 mins before the race            | EBC collected with self-constructed device for 10 to 15 mins, with nose clip, condensated ad -5°C, and stored in liquid nitrogen. MDA was determined with HPLC according to Larstad | unlike the previous results obtained in amateur runners, in physically active subjects, 10 km produces an increase in oxygen- and nitrogen-derived pro-oxidative species, without early per-oxidation             | 7 low       |
| <b>Barregard, 2007, Sweden [9]</b> | To examine whether short-term exposure to wood smoke in healthy subjects affects markers of pulmonary inflammation and oxidative stress. |                                                                                                                                   | 13 healthy subjects, 6 males and 7 women, EBC measured prior to exposure                        | EBC was collected with an Rtube, with nose clip, until 80 liters were collected, samples were frozen at -20°C. MDA was determined with HPLC according to Larstad                    | wood smoke exposure affects the respiratory tract, especially the lower airways                                                                                                                                   | 10 moderate |
| <b>Bartoli, 2011, Italy [10]</b>   | to assess usefulness of MDA in EBC in different groups of pulmonary diseases                                                             | 64 subjects with asthma, 19 with bronchiectasies, 73 with COPD, 38 with idiopathic pulmonary fibrosis                             | 14 healthy nonsmoking subjects                                                                  | EBC was collected on an EcoScreen device, , during 15 mins, samples were immediately at -80°C and analyzed within 6 months, with HPLC according to Larstad                          | Subjects with chronic airway disorders have increased levels of MDA in EBC; that MDA concentrations in EBC are related to FEV1 and neutrophilic inflammation, particularly in COPD patients.                      | 15 moderate |

|                                    |                                                                                                                                                                                             |                                                                                              |                                                                                             |                                                                                                                                                                                                       |                                                                                                                                                                                |             |
|------------------------------------|---------------------------------------------------------------------------------------------------------------------------------------------------------------------------------------------|----------------------------------------------------------------------------------------------|---------------------------------------------------------------------------------------------|-------------------------------------------------------------------------------------------------------------------------------------------------------------------------------------------------------|--------------------------------------------------------------------------------------------------------------------------------------------------------------------------------|-------------|
| <b>Brand, 2013, Germany [11]</b>   | to investigate if short-term exposure to welding fumes results in changes in lung function and early stages of inflammatory reactions.                                                      |                                                                                              | 12 healthy non smoking males                                                                | EBC was collected on ECOSCREEN wearing a nose clip, for 20 mins, samples stored at -80°C until analysis. MDA was derivatized with DNPH and then separated by HPLC and determined by mass spectrometry | In healthy, young subjects neither changes in spirometry nor changes in inflammatory markers measured in exhaled breath condensate could be detected after short term exposure | 12 moderate |
| <b>Caglieri, 2006, Italy [12]</b>  | to investigate Chromium levels in EBC of workers exposed to Cr(VI) and to assess their relationship with biochemical changes in the airways by analyzing EBC biomarkers of oxidative stress | 24 chrome-plating workers                                                                    | 25 controls, 13 males and 12 females; 5 ex-smokers and 20 non smokers                       | EBC was collected on TURBO DECCS, condensation temperature of -5°C, during 15 mins; MDA-EBC was measured by tandem liquid chromatography–mass spectrometry                                            | Cr-EBC levels correlated with those of H2O2-EBC and MDA-EBC, as well as with urinary Cr levels.                                                                                | 14 moderate |
| <b>Casimirri, 2015, Italy [13]</b> | To evaluate if exposure to cleaning agents causes OS and to explore EBC biomarkers linked to demographic characteristics                                                                    | 40 cleaning agents in the same hospital as the controls; 12 current smokers and 5 ex-smokers | 40 controls, 10 smokers, 22 non-smokers and 8 ex-smokers, hospital administrative personnel | EBC was collected on TURBO DECCS, condensation temperature of -5°C, during 15 mins and then stored at -80°C until analysis                                                                            | Professional exposure to chlorinated agents increases EBC biomarkers of oxidative stress and inflammation                                                                      | 15 moderate |

|                                  |                                                                                                                                                                                        |                                                 |                                                                                   |                                                                                                                                                            |                                                                                                                                                                                        |             |
|----------------------------------|----------------------------------------------------------------------------------------------------------------------------------------------------------------------------------------|-------------------------------------------------|-----------------------------------------------------------------------------------|------------------------------------------------------------------------------------------------------------------------------------------------------------|----------------------------------------------------------------------------------------------------------------------------------------------------------------------------------------|-------------|
| <b>Corradi, 2003, Italy [14]</b> | to evaluate if aldehydes could be measured in EBC, to assess the influence of sampling procedures, to compare levels of different pulmonary disease groups with those of control group | 20 patients with stable COPD 18 men and 2 women | 12 smoking controls ( 9 male and 3 women) and 20 non-smoking (17 men and 3 women) | EBC was collected on a Tygon Tube immersed in thawing ice, and then frozen to -80°C, no nose clip, MDA measured with LC-MS tandem                          | aldehydes were identified in EBC, all, but nonal were lower in control groups                                                                                                          | 16 moderate |
| <b>Corradi, 2002, Italy [15]</b> | to investigate short-term exposure to ozone (O3) induces changes in biomarkers of lung inflammation and oxidative stress in EBC                                                        |                                                 | 22 non smoking healthy controls (12 male and female)                              | EBC was collected on ECO SCREEN, during 15 mins, frozen at - 80°C, MDA was measured as TBARS according to Nowak                                            | a single 2-h exposure to 0.1 ppm of O3 induces changes in biomarkers of inflammation and oxidative stress in those susceptible                                                         | 11 moderate |
| <b>Corradi, 2004, Italy [16]</b> | to compare aldehyde levels resulting from lipid peroxidation in EBC and induced sputum (IS) supernatant of subjects with asthma and chronic obstructive pulmonary disease              | 21 subjects with COPD, 10 asthmatics            | 9 healthy non-smoking controls; 8 women and 1 male                                | EBC was collected on a two glass chamber device from Incofar; no nose-clip for 20 mins, samples were stored at -80°C and MDA measured according to Larstad | aldehydes can be detected in both exhaled breath condensate and supernatant of induced sputum, but that their relative concentrations are different and not correlated with each other | 12 moderate |

|                                  |                                                                                                                                                                                        |                                                                                                           |                                                                                                                                                                                                                                                                                                 |                                                                                                                                                                                                           |                                                                                                                                                                             |             |
|----------------------------------|----------------------------------------------------------------------------------------------------------------------------------------------------------------------------------------|-----------------------------------------------------------------------------------------------------------|-------------------------------------------------------------------------------------------------------------------------------------------------------------------------------------------------------------------------------------------------------------------------------------------------|-----------------------------------------------------------------------------------------------------------------------------------------------------------------------------------------------------------|-----------------------------------------------------------------------------------------------------------------------------------------------------------------------------|-------------|
| <b>Doruk, 2011, Turkey [17]</b>  | to investigate oxidative stress in the lungs associated with tobacco smoke and to evaluate the effect of this stress with pulmonary function tests                                     |                                                                                                           | 69 healthy subjects divided in 3 groups according to their exposure to tobacco smoke: 26 current smokers (23 male, 3 female), 21 subjects (15 male, 6 female) who did not smoke within the last year but had second-hand smoking and 22 (100 male and 12 female) with no tobacco smoke exposure | EBC on ECOSCREEN for 15 mins, wearing a noseclip, samples stored at -70°C; MDA measured as TBARS                                                                                                          | The levels of MDA, 8-OHdG, SOD and GSH-Px were higher in smokers. NO levels gradually increased from Group I to Group III. MDA levels were lower in Group III than Group II | 14 moderate |
| <b>Goldoni, 2004, Italy [18]</b> | to investigate whether EBC can be used as a suitable matrix to assess target tissue dose and effects of inhaled cobalt and tungsten, using EBC malondialdehyde (MDA) as a biomarker of | 33 workers exposed to Co and W in workshops producing either diamond tools or hard-metal mechanical parts | 16 controls (11 male and 5 females)                                                                                                                                                                                                                                                             | EBC was collected on a homemade apparatus, during 10 mins, samples were transported in ice to lab and then stored at -80°C; MDA was measured by liquid chromatography tandem mass spectrometry (LC-MS/MS) | MDA levels were increased depending on cobalt concentration and were enhanced by coexposure to tungsten.                                                                    | 11 moderate |

---

pulmonary  
oxidative stress.

|                                      |                                                                                                                                   |                                                                                |                                                                                                                                                                                                                                                  |                                                                                                                                                                                                         |             |
|--------------------------------------|-----------------------------------------------------------------------------------------------------------------------------------|--------------------------------------------------------------------------------|--------------------------------------------------------------------------------------------------------------------------------------------------------------------------------------------------------------------------------------------------|---------------------------------------------------------------------------------------------------------------------------------------------------------------------------------------------------------|-------------|
| <b>Goldoni, 2013,<br/>Italy [19]</b> | to compare the concentration of several biomarkers in whole (W-EBC) and fractionated EBC (A-EBC)                                  | 45 healthy subjects (10 males and 35 females); 6 smokers and 39 non-smokers    | EBC collected on a homemade apparatus for the fractioned EBC and a TURBODECCS for the whole EBC for 15 mins without a noseclip, EBC was centrifuged and then stored at -80°C; MDA was measured by liquid chromatography tandem-mass spectrometry | H2O2 , 8-isoprostane, malondialdehyde and 4-hydroxy-2-nonenal were all higher in W-EBC, suggesting a contribution from the upper airways to oxidative stress biomarkers in apparently healthy subjects. | 10 moderate |
| <b>Goldoni, 2005,<br/>Italy [20]</b> | test the effect of condensation temperature on the parameters of exhaled breath condensate and the levels of selected biomarkers. | 24 healthy subjects (13 males and 11 females)- 3 ex-smokers and 21 non-smokers | EBC was collected on a TURBODECCS, during 10 mins, at different temperatures, samples were centrifuged and then stored at -80°C, MDA was measured by liquid chromatography-mass spectrometry tandem (LC-MS/MS) within 2 weeks                    | cooling temperature of exhaled breath condensate collection influenced selected biomarkers                                                                                                              | 13 moderate |

---

|                                        |                                                                                                                                                                                                      |                 |                                                                                                                                          |                                                                                                                                                                                                                                                       |                                                                                                                                                                                                                                                                  |             |
|----------------------------------------|------------------------------------------------------------------------------------------------------------------------------------------------------------------------------------------------------|-----------------|------------------------------------------------------------------------------------------------------------------------------------------|-------------------------------------------------------------------------------------------------------------------------------------------------------------------------------------------------------------------------------------------------------|------------------------------------------------------------------------------------------------------------------------------------------------------------------------------------------------------------------------------------------------------------------|-------------|
| <b>Gong, 2014, USA/China [21]</b>      | to compare ultrafine particles (UFPs) and fine particles (PM2.5) in their associations with biomarkers reflecting multiple pathophysiological pathways linking exposure and cardiorespiratory events |                 | 125 healthy non-smoking individuals, initially 64 males and 64 women working on a campus near Peking's University Health Sciences Centre | EBC on ECOSCREEN , collected for 20 mins, with noseclip, aliquotes stored at -70°C, MDA was measured as MDA-TBA in HPLC                                                                                                                               | associations of certain biomarkers with UFPs had different lag patterns compared to those with PM2.5, suggesting that the ultrafine size fraction and the fine size fraction of PM2.5 are likely to affect PM-induced pathophysiological pathways independently. | 15 moderate |
| <b>Graczyk, 2016, Switzerland [22]</b> | to investigate time course changes of particle-associated oxidative stress in exposed tungsten inert gas welders.                                                                                    |                 | 20 nonsmoking healthy volunteers, with less than 1 year of apprentice in welding                                                         | EBC was collected on an Rtube, during 10 mins, while wearing a noseclip, EBC samples were stored at -70°C; MDA was measured by HPLC separation and fluorescence detection TBARS                                                                       | A 60-min exposure to TIG welding fume in a controlled, well-ventilated setting induced acute oxidative stress at 3 h post exposure in healthy, non-smoking apprentice welders not chronically exposed to welding fumes.                                          | 10 moderate |
| <b>Gube, 2010, Germany [23]</b>        | to investigate the effect of welding as well as the impact of smoking and protection measures on biological markers in EBC                                                                           | 45 male welders | 24 healthy male non exposed                                                                                                              | EBC was collected on ECOSCREEN, wearing a noseclip, as long as 200l oh exhaled breath was collected, then stored at -80°C; MDA was measured with a previously described but slightly changed method- MDA derivatized with DNPH and separated by HPLC, | welders showed significantly increased concentrations of all these parameters at baseline compared to non-exposed controls                                                                                                                                       | 14 moderate |



then tandem-mass  
spectrometry

**Inonu, 2012,  
Turkey [24]**

to evaluate the differences in the burden of oxidative stress in patients with COPD, smokers, and non-smokers by measuring hydrogen peroxide (H<sub>2</sub>O<sub>2</sub>), malondialdehyde (MDA), and 8-isoprostane levels in EBC

25 male COPD smokers

26 smokers and 29 non-smokers males healthy

EBC collected on EcoScreen, 15 mins with nose clip and then quickly stored at -70°C for 6 months, MDA was measured a commercial kit in fluorescence detector in HPLC

Even if respiratory function tests are within normal limits, oxidant burden in lungs of smokers is equivalent to that in COPD patients. 8-isoprostane could be useful in assessing symptom severity and health status of COPD patients

16 moderate

|                                   |                                                                                                                                                                                       |                                                          |                                               |                                                                                                                                                                                                                                           |                                                                                                                                                                                                                                                                                                 |             |
|-----------------------------------|---------------------------------------------------------------------------------------------------------------------------------------------------------------------------------------|----------------------------------------------------------|-----------------------------------------------|-------------------------------------------------------------------------------------------------------------------------------------------------------------------------------------------------------------------------------------------|-------------------------------------------------------------------------------------------------------------------------------------------------------------------------------------------------------------------------------------------------------------------------------------------------|-------------|
| <b>Larstad, 2001, Sweden [25]</b> | to develop a method of MDA quantification                                                                                                                                             | 29 patients with asthma, 7 of which with wheezing        | 15 without asthma                             | EBC was collected on ECOSCREEN, during 4 mins with a nose clip, stored at -20°C until analysis, MDA was measured using TBS at 95°C and then separated by HPLC and MDA-TBA measured by fluorescence                                        | no statistically significant difference between patients with asthma and patients without asthma. However, among females, subjects with asthma had higher MDA levels as compared to females without asthma. The use of the method when studying airway inflammation has to be further evaluated | 12 moderate |
| <b>Laumbach, 2014, USA [26]</b>   | to determine if exposure to traffic-related pollutants particles (TRAPs) during commuting causes acute oxidative stress in the respiratory tract or changes in heart rate variability |                                                          | 21 young volunteers, 15 males and 6 women     | EBC collected with ECOSCREEN device, for 20 mins, samples were frozen to -80°C, MDA analysis, was performed by using a mixture of EBC, phosphoric acid, and thiobarbituric acid, was heated and injected into an HPLC-fluorescence system | Increases in markers of oxidative stress in EBC may represent early biological responses to widespread exposures to TRAPs particles that affect passengers in vehicles on heavily trafficked roadways                                                                                           | 9 low       |
| <b>Lee, 2015, Korea [27]</b>      | to investigate the actual health effects of multi wall carbon nanotubes in manufacturing workers                                                                                      | 9 male carbon nanotubes manufacturing workers, 5 smokers | 4 office workers, 3 male, 1 female; 2 smokers | EBC was collected on an Rtube, during 10 mins, with a noseclip, stored in dry ice for 2 weeks. MDA was measured using fluorescence HPLC                                                                                                   | analyzed biomarkers in the MWCNT manufacturing workers were significantly higher than those in the office workers; MDA, n-hexanal and molybdenum could be useful biomarkers of MWCNT exposure.                                                                                                  | 10 moderate |

|                                    |                                                                                                                                                                                          |                                                                       |                                                                          |                                                                                                                                                                                     |                                                                                                                                                                                                                                                                                                       |             |
|------------------------------------|------------------------------------------------------------------------------------------------------------------------------------------------------------------------------------------|-----------------------------------------------------------------------|--------------------------------------------------------------------------|-------------------------------------------------------------------------------------------------------------------------------------------------------------------------------------|-------------------------------------------------------------------------------------------------------------------------------------------------------------------------------------------------------------------------------------------------------------------------------------------------------|-------------|
| <b>Majewska, 2004, Poland [28]</b> | To determine whether concentrations of H <sub>2</sub> O <sub>2</sub> and TBARS in EBC is elevated and correlate with systemic response to pneumonia during 10 days of hospital treatment | 43 inpatients with community acquired pneumonia; 12 females/ 31 males | 20 healthy non smoking controls, 6 females and 14 males                  | EBC was collected on a device from Jaeger, cooled with ethanol at -9°C, during 20 mins, wearing a nosclip, stored on ice until measurement was performed. MDA was measured as TBARS | Pneumonia is accompanied by oxidative stress in airways that moderately correlates with intensity of systemic inflammatory response. Determination of H <sub>2</sub> O <sub>2</sub> in EBC may be helpful for non-invasive monitoring of oxidants production during lower respiratory tract infection | 13 moderate |
| <b>Nowak, 2001, Poland [29]</b>    | to investigate the concentration of H <sub>2</sub> O <sub>2</sub> and TBARS in EBC and influencing factors                                                                               |                                                                       | 58 healthy volunteers, 18 smokers, 40 non smokers, 31 males and 27 women | EBC was collected on a device from Jaeger Toennies, during 20 mins, wearing a noseclipately used. MDA was measured as TBARS spectrofotometrically                                   | Neither moderate exercise nor one puff of salbutamol nor ipratropium influenced significantly the concentration of H <sub>2</sub> O <sub>2</sub> and TBARS in EBC. Only 4 of 120 EBC specimens from never smoked subjects revealed detectable levels of TBARS. Cigarette smokers exhaled more TBARS   | 11 moderate |

|                                            |                                                                                                                                                                                                                    |                                                                                             |                                                                                                             |                                                                                                                                                       |                                                                                                                                                                                                                                                                                                                                             |             |
|--------------------------------------------|--------------------------------------------------------------------------------------------------------------------------------------------------------------------------------------------------------------------|---------------------------------------------------------------------------------------------|-------------------------------------------------------------------------------------------------------------|-------------------------------------------------------------------------------------------------------------------------------------------------------|---------------------------------------------------------------------------------------------------------------------------------------------------------------------------------------------------------------------------------------------------------------------------------------------------------------------------------------------|-------------|
| <b>Pelclova, 2018, Czech Republic [30]</b> | to investigate lung oxidative stress in workers handling nanocomposites                                                                                                                                            | 19 nanocomposite-synthesizing and processing researchers (14 men, 5 women, all non-smokers) | 19, 13 men, 6 women, all non-smokers                                                                        | EBC was collected on ECOSCREEN, until a minimum of 120 l of exhaled breath, wearing a noseclip, immediately stored at -80°C. MDA was measured         | Significant associations were found between working in nanocomposite synthesis and EBC biomarkers. More research is needed to understand the contribution of nanoparticles from nanocomposite processing in inducing oxidative stress, relative to other co-exposures generated during welding, smelting, and secondary oxidation processes | 12 moderate |
| <b>Pelclova, 2014, Czech Republic [31]</b> | To search for optimal markers in the exhaled breath condensate (EBC), plasma and urine that would reflect the activity/severity of occupational asthma (OA) after the withdrawal from the exposure to the allergen | 43 subjects with previously diagnosed immunological OA 18 men, 25 women                     | 20 subjects, working as office or health care employees and having no symptoms of asthma, 10 men, 10 women, | EBC was collected for 15–20 min with EcoScreen, wearing a noseclip, samples were stored at -80°C for max 2 months, MDA was measured with LC-ESI-MS/MS | improvement in OA is very slow and objective impairments persist years after removal from the exposure. Cysteinyl LTs and 8-ISO in EBC and 8-ISO in plasma might enrich the spectrum of useful objective tests for the follow-up of OA.                                                                                                     | 12 moderate |
| <b>Pelclova, 2016, Czech Republic [32]</b> | to investigate the utility of oxidative stress biomarkers in EBC in iron oxide pigment                                                                                                                             | 14 workers males, 43 ± 7 years, 43% smokers                                                 | 14 males, 39 ± 4 years, 50% smokers, non-exposed                                                            | EBC was collected for 15 mins with EcoScreen, wearing a noseclip, samples were stored at -80°C, MDA was measured with LC-ESI-MS/MS                    | Almost all markers of lipid, nucleic acid and protein oxidation were elevated in the EBC of workers comparing with control subjects. Markers in urine were not elevated                                                                                                                                                                     | 10 moderate |

---

production  
workers

|                                  |                                                                                                                                                                                                    |                                                                                                                    |                                                                                                                                                             |                                                                                                                                                                                                             |             |
|----------------------------------|----------------------------------------------------------------------------------------------------------------------------------------------------------------------------------------------------|--------------------------------------------------------------------------------------------------------------------|-------------------------------------------------------------------------------------------------------------------------------------------------------------|-------------------------------------------------------------------------------------------------------------------------------------------------------------------------------------------------------------|-------------|
| <b>Ricelli, 2018, Italy [33]</b> | to investigate the Chromium and Nickel content of EBC of stainless steel (SS) tungsten inert gas (TIG) welders, and relate their concentrations with oxidative stress and inflammatory biomarkers. | 100 SS welding workers aged 18–65 years; Smokers/non-smokers/ex-smokers 33/36/31, values were considered pre-shift | EBC was collected on ECOSCREEN, during 15 mins, and stored at -80°C, MDA was determined by tandem LC-MS/MS                                                  | given the weak relationship between the biomarkers and effects of exposure, we speculate that other substances generated during SS TIG welding also play a role in generating lung oxidative stress.        | 11 moderate |
| <b>Rundell, 2008, USA [34]</b>   | to investigate PM1 inhalation during exercise on lung function, exhaled nitric oxide (eNO), and total nitrate (NO3), S-nitrosoglutathione (GSNO), and malondialdehyde (MDA) in EBC                 | Twelve physically fit, nonasthmatic, nonsmoking males                                                              | EBC was collected on ECOSCREEN, during 15 mins, wearing a noseclip and stored at -80°C; MDA was measured after derivatization with TBA by HPLC fluorescence | MDA increased 40% after low PM exercise, high PM1 inhalation during exercise caused a reduced alveolar contribution to eNO; NO3 and eNO variables were decreased and were related to impaired lung function | 9 low       |

---

|                                        |                                                                                                                                                                                                                       |                                      |                                                                                                                  |                                                                                                                                                                                                            |                                                                                                                                                                                                                      |             |
|----------------------------------------|-----------------------------------------------------------------------------------------------------------------------------------------------------------------------------------------------------------------------|--------------------------------------|------------------------------------------------------------------------------------------------------------------|------------------------------------------------------------------------------------------------------------------------------------------------------------------------------------------------------------|----------------------------------------------------------------------------------------------------------------------------------------------------------------------------------------------------------------------|-------------|
| <b>Sakhvidi, 2015, Iran [35]</b>       | to measure exhaled breath malondialdehyde (EBC-MDA) in workers exposed to dust containing silica and at its comparison with the non-exposed control group.                                                            | 25 male workers in a ceramic factory | 25 male subjects from administrative departments of the same factory                                             | EBC was collected with a home made apparatus, during 5 mins, wearing a noseclip, samples were stored in freezer at -20° until examination;MDA was analyzed by an HPLC equipped with a fluorescent detector | significant correlation between respirable dust exposure intensity and the level of EBC-MDA of the exposed subjects, but no significant correlation with lung functions                                              | 13 moderate |
| <b>Sauvain, 2014, Switzerland [36]</b> | to evaluate the feasibility of using exhaled breath condensate (EBC) from healthy volunteers for (1) assessing the lung deposited dose of combustion nanoparticles and (2) determining the resulting oxidative stress |                                      | 15 healthy nonsmokers                                                                                            | EBC collected on a Rtube, during 10 mins, wearing a noseclip, a aliquote was stored at -78°C, MDA was derivatized with TBA then measure with HPLC fluorescence                                             | results suggest two phases of oxidation markers in EBC: first, the initial deposition of particles and gases in the lung lining liquid, and later the start of oxidative stress with associated cell membrane damage | 11 moderate |
| <b>Stockfelt, 2012, Sweden [37]</b>    | to examine airway effects of two kinds of wood smoke in a chamber study                                                                                                                                               |                                      | 16 healthy never-smoking subjects (8 men and 8 women), 3 excluded for respiratory problems before the experiment | EBC collected according to Barregard; MDA measured always according to Barregard                                                                                                                           | relatively low levels of wood smoke exposure induce effects on airways                                                                                                                                               | 8 low       |

|                                            |                                                                                                                                                                              |                                                                                            |                                                                                |                                                                                                                                                                 |                                                                                                                                                                                                                  |             |
|--------------------------------------------|------------------------------------------------------------------------------------------------------------------------------------------------------------------------------|--------------------------------------------------------------------------------------------|--------------------------------------------------------------------------------|-----------------------------------------------------------------------------------------------------------------------------------------------------------------|------------------------------------------------------------------------------------------------------------------------------------------------------------------------------------------------------------------|-------------|
| <b>Syslova, 2009, Czech Republic [38]</b>  | to develop a sensitive method for a parallel, rapid and precise determination of the most prominent oxidative stress biomarkers for patients with silica or asbestos disease | 20 subjects with previous exposure to silica or asbestos and related disease               | 10 subjects                                                                    | EBC was collected on ECOSCREEN, for 5-10 mins, wearing a nose-clip, frozen at -80°C and stored max 1 month, MDA was measured with optimized LC-ESI-MS/MS        | The difference in concentration levels of biomarkers between the two groups was perceptible in all the body fluids (the difference observed in an exhaled breath condensate was statistically most significant). | 12 moderate |
| <b>Szkudlarek, 2003, Poland [39]</b>       | to test whether exhalation of H <sub>2</sub> O <sub>2</sub> and TBARS by healthy subjects depends on reactive oxygen species generation from blood phagocytes                |                                                                                            | 41 healthy, never smoked subjects (mean age 20.77±0.8 years, 18 men, 23 women) | EBC was collected on a home made mouth piece connected to a glass tube cooler; wearing a noseclip, during 20 mins; MDA was measured as TBARS according to Nowak | No association between exhaled TBARS and blood phagocytes activity was found.                                                                                                                                    | 10 moderate |
| <b>Pelclova, 2020, Czech Republic [40]</b> | to analyze biomarkers in EBC of nanocomposites workers and understand about health effects                                                                                   | 20 researchers handling nanocomposites ; 15 men and 5 women, 19 non smokers, 41.8 mean age | 21 controls; 15 men, 6 women, office employees; 19 non-smokers, 42.7 y.o       | EBC was collected on ECOSCREEN and stored at -80°C, MDA was measured with LC-ESI-MS/MS                                                                          | among inflammation markers, LT4 and tumor necrosis factor were the most useful                                                                                                                                   | 10 moderate |

## References

1. Aksu K, Kurt H, Gündüz E, Değirmenci I, Kurt E. Inflammatory markers in exhaled breath condensate in patients with asthma and rhinitis. *Tuberk Toraks*. 2012;60(4):321-6.
2. Andreoli R, Manini P, Corradi M, Mutti A, Niessen WMA. Determination of patterns of biologically relevant aldehydes in exhaled breath condensate of healthy subjects by liquid chromatography/atmospheric chemical ionization tandem mass spectrometry. *Rapid Commun Mass Spectrom*. 15 avr 2003;17(7):637-45.
3. Antus B, Drozdovszky O, Barta I, Kelemen K. Comparison of Airway and Systemic Malondialdehyde Levels for Assessment of Oxidative Stress in Cystic Fibrosis. *Lung*. août 2015;193(4):597-604.
4. Antus B, Harnasi G, Drozdovszky O, Barta I. Monitoring oxidative stress during chronic obstructive pulmonary disease exacerbations using malondialdehyde: MDA and COPD exacerbations. *Respirology*. janv 2014;19(1):74-9.
5. Antczak A, Nowak D, Shariati B, Król M, Piasecka G, Kurmanowska Z. Increased hydrogen peroxide and thiobarbituric acid-reactive products in expired breath condensate of asthmatic patients. *European Respiratory Journal*. 1 juin 1997;10(6):1235-41.
6. Araneda O, García C, Lagos N, Quiroga G, Cajigal J, Salazar M, et al. Lung oxidative stress as related to exercise and altitude. Lipid peroxidation evidence in exhaled breath condensate: a possible predictor of acute mountain sickness. *Eur J Appl Physiol*. déc 2005;95(5-6):383-90.
7. Araneda O, Guevara A, Contreras C, Lagos N, Berral F. Exhaled Breath Condensate Analysis after Long Distance Races. *Int J Sports Med*. 12 juill 2012;33(12):955-61.
8. Araneda OF, Urbina-Stagno R, Tuesta M, Haichelis D, Alvear M, Salazar MP, et al. Increase of pro-oxidants with no evidence of lipid peroxidation in exhaled breath condensate after a 10-km race in non-athletes. *J Physiol Biochem*. mars 2014;70(1):107-15.
9. Barregard L, Sallsten G, Andersson L, Almstrand AC, Gustafson P, Andersson M, et al. Experimental exposure to wood smoke: effects on airway inflammation and oxidative stress. *Occupational and Environmental Medicine*. 1 mai 2008;65(5):319-24.
10. Bartoli ML, Novelli F, Costa F, Malagrino L, Melosini L, Bacci E, et al. Malondialdehyde in Exhaled Breath Condensate as a Marker of Oxidative Stress in Different Pulmonary Diseases. *Mediators of Inflammation*. 2011;2011:1-7.
11. Brand P, Bischof K, Siry L, Bertram J, Schettgen T, Reisgen U, et al. Exposure of healthy subjects with emissions from a gas metal arc welding process: part 3—biological effect markers and lung function. *Int Arch Occup Environ Health*. janv 2013;86(1):39-45.



12. Caglieri A, Goldoni M, Acampa O, Andreoli R, Vettori MV, Corradi M, et al. The Effect of Inhaled Chromium on Different Exhaled Breath Condensate Biomarkers among Chrome-Plating Workers. *Environmental Health Perspectives*. avr 2006;114(4):542-6.
13. Casimirri E, Stendardo M, Bonci M, Andreoli R, Bottazzi B, Leone R, et al. Biomarkers of oxidative-stress and inflammation in exhaled breath condensate from hospital cleaners. *Biomarkers*. 17 févr 2016;21(2):115-22.
14. Corradi M, Rubinstein I, Andreoli R, Manini P, Caglieri A, Poli D, et al. Aldehydes in Exhaled Breath Condensate of Patients with Chronic Obstructive Pulmonary Disease. *Am J Respir Crit Care Med*. 15 mai 2003;167(10):1380-6.
15. Corradi M, Alinovi R, Goldoni M, Vettori MV, Folesani G, Mozzoni P, et al. Biomarkers of oxidative stress after controlled human exposure to ozone. *Toxicology Letters*. août 2002;134(1-3):219-25.
16. Corradi M. Comparison between exhaled and sputum oxidative stress biomarkers in chronic airway inflammation. *European Respiratory Journal*. 1 déc 2004;24(6):1011-7.
17. Doruk S, Ozyurt H, Inonu H, Erkorkmaz U, Saylan O, Seyfikli Z. Oxidative status in the lungs associated with tobacco smoke exposure. *Clinical Chemistry and Laboratory Medicine (CCLM)* [Internet]. 1 janv 2011 [cité 30 mars 2022];49(12). Disponible sur: <https://www.degruyter.com/document/doi/10.1515/CCLM.2011.698/html>
18. Goldoni M, Catalani S, De Palma G, Manini P, Acampa O, Corradi M, et al. Exhaled Breath Condensate as a Suitable Matrix to Assess Lung Dose and Effects in Workers Exposed to Cobalt and Tungsten. *Environmental Health Perspectives*. sept 2004;112(13):1293-8.
19. Goldoni M, Corradi M, Mozzoni P, Folesani G, Alinovi R, Pinelli S, et al. Concentration of exhaled breath condensate biomarkers after fractionated collection based on exhaled CO<sub>2</sub> signal. *J Breath Res*. 27 févr 2013;7(1):017101.
20. Goldoni M, Caglieri A, Andreoli R, Poli D, Manini P, Vettori MV, et al. Influence of condensation temperature on selected exhaled breath parameters. *BMC Pulm Med*. déc 2005;5(1):10.
21. Gong J, Zhu T, Kipen H, Wang G, Hu M, Ohman-Strickland P, et al. Malondialdehyde in exhaled breath condensate and urine as a biomarker of air pollution induced oxidative stress. *J Expo Sci Environ Epidemiol*. mai 2013;23(3):322-7.
22. Graczyk H, Lewinski N, Zhao J, Sauvain JJ, Suarez G, Wild P, et al. Increase in oxidative stress levels following welding fume inhalation: a controlled human exposure study. *Part Fibre Toxicol*. déc 2015;13(1):31.

23. Gube M, Ebel J, Brand P, Göen T, Holzinger K, Reisgen U, et al. Biological effect markers in exhaled breath condensate and biomonitoring in welders: impact of smoking and protection equipment. *Int Arch Occup Environ Health*. oct 2010;83(7):803-11.
24. Inonu H, Doruk S, Sahin S, Erkorkmaz U, Celik D, Celikel S, et al. Oxidative Stress Levels in Exhaled Breath Condensate Associated With COPD and Smoking. *Respiratory Care*. 1 mars 2012;57(3):413-9.
25. Lärstad M, Ljungkvist G, Olin AC, Torén K. Determination of malondialdehyde in breath condensate by high-performance liquid chromatography with fluorescence detection. *Journal of Chromatography B*. janv 2002;766(1):107-14.
26. Laumbach RJ, Kipen HM, Ko S, Kelly-McNeil K, Cepeda C, Pettit A, et al. A controlled trial of acute effects of human exposure to traffic particles on pulmonary oxidative stress and heart rate variability. *Part Fibre Toxicol*. déc 2014;11(1):45.
27. Lee JS, Choi YC, Shin JH, Lee JH, Lee Y, Park SY, et al. Health surveillance study of workers who manufacture multi-walled carbon nanotubes. *Nanotoxicology*. 18 août 2015;9(6):802-11.
28. Majewska E, Kasielski M, Luczynski R, Bartosz G, Bialasiewicz P, Nowak D. Elevated exhalation of hydrogen peroxide and thiobarbituric acid reactive substances in patients with community acquired pneumonia. *Respiratory Medicine*. juill 2004;98(7):669-76.
29. Nowak D, Kałucka S, Białasiewicz P, Król M. Exhalation of H<sub>2</sub>O<sub>2</sub> and thiobarbituric acid reactive substances (TBARs) by healthy subjects. *Free Radical Biology and Medicine*. janv 2001;30(2):178-86.
30. Pelclova D, Zdimal V, Schwarz J, Dvorackova S, Komarc M, Ondracek J, et al. Markers of Oxidative Stress in the Exhaled Breath Condensate of Workers Handling Nanocomposites. *Nanomaterials*. 10 août 2018;8(8):611.
31. Pelclová D, Fenclová Z, Vlčková Š, Klusáčková P, Lebedová J, Syslová K, et al. Occupational asthma follow-up — which markers are elevated in exhaled breath condensate and plasma? *International Journal of Occupational Medicine and Environmental Health* [Internet]. 1 janv 2014 [cité 30 mars 2022];27(2). Disponible sur: <http://ijomeh.eu/Occupational-asthma-follow-up-Which-markers-are-elevated-in-exhaled-breath-condensate-and-plasma-,2044,0,2.html>
32. Pelclova D, Zdimal V, Kacer P, Fenclova Z, Vlckova S, Syslova K, et al. Oxidative stress markers are elevated in exhaled breath condensate of workers exposed to nanoparticles during iron oxide pigment production. *J Breath Res*. 1 févr 2016;10(1):016004.
33. Riccelli MG, Goldoni M, Andreoli R, Mozzoni P, Pinelli S, Alinovi R, et al. Biomarkers of exposure to stainless steel tungsten inert gas welding fumes and the effect of exposure on exhaled breath condensate. *Toxicology Letters*. août 2018;292:108-14.

34. Rundell KW, Slee JB, Caviston R, Hollenbach AM. Decreased Lung Function After Inhalation of Ultrafine and Fine Particulate Matter During Exercise is Related to Decreased Total Nitrate in Exhaled Breath Condensate. *Inhalation Toxicology*. janv 2008;20(1):1-9.
35. Sakhvidi MJZ, Ardekani JB, Firoozichahak A, Zavarreza J, Hajaghazade M, Mostaghaci M, et al. Archive About the Journal Instructions for Authors Instructions for Reviewers Editorial Office Editorial Board Contact Reviewers 2014 2013 < PREVIOUS NEXT > ORIGINAL PAPER CC BY-NC 3.0 Polska Exhaled breath malondialdehyde, spirometric results and dust exposure assessment in ceramics production workers. *Int J Occup Med Environ Health*. 28 févr 2015;81-9.
36. Sauvain JJ, Hohl MSS, Wild P, Pralong JA, Riediker M. Exhaled Breath Condensate as a Matrix for Combustion-Based Nanoparticle Exposure and Health Effect Evaluation. *Journal of Aerosol Medicine and Pulmonary Drug Delivery*. déc 2014;27(6):449-58.
37. Stockfelt L, Sallsten G, Olin AC, Almerud P, Samuelsson L, Johannesson S, et al. Effects on airways of short-term exposure to two kinds of wood smoke in a chamber study of healthy humans. *Inhalation Toxicology*. janv 2012;24(1):47-59.
38. Syslová K, Kačer P, Kuzma M, Najmanová V, Fenclová Z, Vlčková Š, et al. Rapid and easy method for monitoring oxidative stress markers in body fluids of patients with asbestos or silica-induced lung diseases. *Journal of Chromatography B*. août 2009;877(24):2477-86.
39. Szkudlarek U, Maria L, Kasielski M, Kaucka S, Nowak D. Exhaled hydrogen peroxide correlates with the release of reactive oxygen species by blood phagocytes in healthy subjects. *Respiratory Medicine*. juin 2003;97(6):718-25.
40. Tanger SRO, éditeur. 10th Anniversary International Conference on Nanomaterials - Research and Application (NANOCON 2018): Brno, Czech Republic, 17-19 October 2018. Red Hook, NY: Curran Associates; 2019. 741 p.
